# Supplementary material for: Effect of (H2O)n (n = 1 and 2) on HOCl + Cl reaction
Source: Royal Society of Chemistry journal article supplement (doi:10.1039/d2cp04044a), 2023-01-01
Supplement: d2cp04044a1.pdf [file d2cp04044a1.pdf]

**Supplementary Information for**  
**Effect of  $(\text{H}_2\text{O})_n$  ( $n=1$  and  $2$ ) on  $\text{HOCl} + \text{Cl}$**   
**reaction**

Amit Kumar and Pradeep Kumar\*

*Department of Chemistry, Malaviya National Institute of Technology Jaipur, Jaipur,*  
*302017, India*

E-mail: [pradeep.chy@mnit.ac.in](mailto:pradeep.chy@mnit.ac.in)



## Sl. No.

## Contents

1. Formal proof for same value of termolecular rate constant for different paths of water catalyzed  $\text{HOCl} + \text{Cl}^\bullet \longrightarrow \text{HCl} + \text{ClO}^\bullet$  reaction.
2. **Table S1:** Comparison of frequencies obtained at CCSD/aug-cc-pVDZ level of theory with frequencies obtained at higher level of theory (CCSD(T)/cc-pVQZ).
3. **Table S2:** Contribution of post-CCSD(T) corrections ( $\text{kcal mol}^{-1}$ ) to the energy barrier for  $\text{HOCl} + \text{Cl} \rightarrow \text{HCl} + \text{ClO}$  reaction.
4. **Table S3:** Contribution of post-CCSD(T) corrections ( $\text{kcal mol}^{-1}$ ) to the energy barrier for  $\text{HOCl} + \text{Cl} \rightarrow \text{Cl}_2 + \text{OH}$  reaction.
5. **Table S4:** Coordinates (in angstrom) and frequencies (in  $\text{cm}^{-1}$ ) of all the important geometries of water catalyzed  $\text{HOCl} + \text{Cl}$  reaction optimized at M062-2X/aug-cc-pVTZ level of theory.
6. **Table S5:** Zero curvature tunneling (ZCT) correction for uncatalyzed, water and water dimer catalyzed for  $\text{HOCl} + \text{Cl} \rightarrow \text{Cl}_2 + \text{OH}$  reaction
7. **Table S6:** Comparison of energy barrier obtained for  $\text{TS}_{uncat}$  using different methods.
8. **Table S7:** Bimolecular rate constant  $k_{bi}$  (in  $\text{cm}^3 \text{ molecule}^{-1} \text{ s}^{-1}$ ) for  $\text{H}_2\text{O}$  catalyzed and uncatalyzed  $\text{HOCl} + \text{Cl}^\bullet \rightarrow \text{ClO}^\bullet + \text{HCl}$  reaction within temperature range 213-320 K.
9. **Table S8:** Bimolecular rate constant  $k_{bi}$  (in  $\text{cm}^3 \text{ molecule}^{-1} \text{ s}^{-1}$ ) for  $\text{H}_2\text{O}$ , and  $(\text{H}_2\text{O})_2$  catalyzed and uncatalyzed  $\text{HOCl} + \text{Cl}^\bullet \rightarrow \text{OH}^\bullet + \text{Cl}_2$  reaction within temperature range 213-320 K
10. **Table S9:** Values of rate constants  $k_{HL}^{TST}$  in  $\text{cm}^3 \text{ molecule}^{-1} \text{ s}^{-1}$ , transmission coefficient ( $\Gamma_{LL}$ ), and ZCT and SCT tunneling correction for bare  $\text{HOCl} + \text{Cl} \rightarrow \text{HCl} + \text{ClO}$  reaction.
11. **Table S10:** Comparison of energetics obtained at different level of theory for  $\text{HOCl} + \text{Cl} \rightarrow \text{HCl} + \text{ClO}$  reaction.
12. **Table S11:** Bimolecular rate constant  $k_{bi}$  (in  $\text{cm}^3 \text{ molecule}^{-1} \text{ s}^{-1}$ ) for  $(\text{H}_2\text{O})_2$  catalyzed and uncatalyzed  $\text{HOCl} + \text{Cl}^\bullet \rightarrow \text{ClO}^\bullet + \text{HCl}$  reaction within temperature range 213-320 K..
13. **Table S12:** Termolecular rate constant ( $\text{cm}^6 \text{ molecule}^{-2} \text{ s}^{-1}$ ) for water catalyzed  $\text{HOCl} + \text{Cl}^\bullet \longrightarrow \text{HCl} + \text{ClO}^\bullet$  reaction within temperature range of 213 K - 320 K.
14. **Table S13:** Termolecular rate constant ( $\text{cm}^6 \text{ molecule}^{-2} \text{ s}^{-1}$ ) for water catalyzed  $\text{HOCl} + \text{Cl}^\bullet \longrightarrow \text{Cl}_2 + \text{OH}^\bullet$  reaction within temperature range of 213 K - 320 K.
15. **Table S14:** Values of rate constants  $k_{HL}^{TST}$  in  $\text{s}^{-1}$ , transmission coefficient ( $\Gamma_{LL}$ ), and ZCT and SCT tunneling correction for water monomer catalyzed  $\text{HOCl} + \text{Cl} \rightarrow \text{HCl} + \text{ClO}$  reaction.
16. **Table S15:** Values of rate constants  $k_{HL}^{TST}$  in  $\text{s}^{-1}$ , transmission coefficient ( $\Gamma_{LL}$ ), and ZCT and SCT tunneling correction for water dimer catalyzed  $\text{HOCl} + \text{Cl} \rightarrow \text{HCl} + \text{ClO}$  reaction.
17. **Figure S1:** Comparison of geometrical parameters obtained at CCSD/aug-cc-pVDZ level of theory with others level of theory. All bond length are given in Å.
18. **Figure S2:** IRC calculation for  $\text{HOCl} + \text{Cl}$  reaction at M062X/aug-cc-pVTZ level of theory.

19. **Figure S3:** Comparison of geometrical parameters obtained at MO6-2X/aug-cc-pVTZ level of theory with CCSD/aug-cc-pVDZ level of theory ( in parenthesis) for water catalyzed  $\text{HOCl} + \text{Cl} \rightarrow \text{HCl} + \text{ClO}$  reaction. All bond length are given in Å.
20. **Figure S4:** Gibbs free energy profile for  $\text{H}_2\text{O}$  catalyzed  $\text{HOCl} + \text{Cl}^\bullet \rightarrow \text{HCl} + \text{ClO}^\bullet$  reaction, calculated at CCSD(T)/CBS//M06-2X/aug-cc-pVTZ level of theory.
21. **Figure S5:** Gibbs free energy profile for  $(\text{H}_2\text{O})_2$  catalyzed  $\text{HOCl} + \text{Cl}^\bullet \rightarrow \text{HCl} + \text{ClO}^\bullet$  reaction , calculated at CCSD(T)/CBS//M06-2X/aug-cc-pVTZ level of theory.

**1 Formal proof for same value of termolecular rate constant for different paths of water catalyzed HOCl + Cl• → HCl + ClO• reaction.**

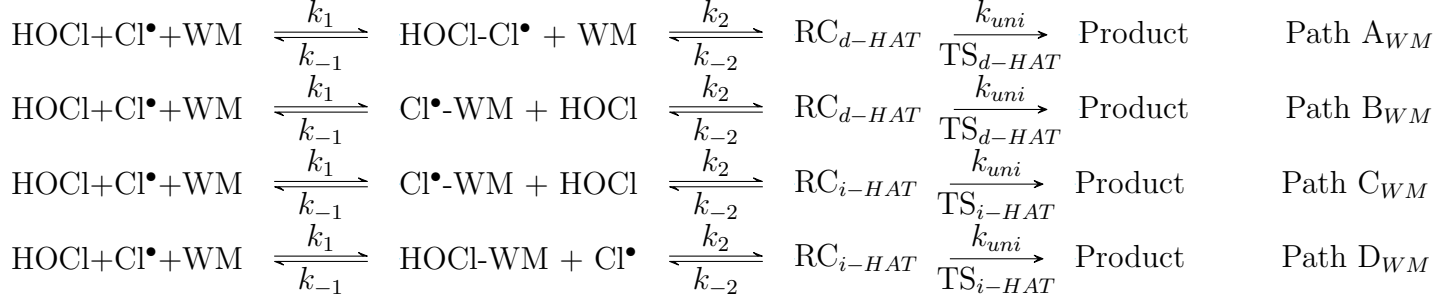

For path A<sub>WM</sub>,

$$K_{eq1} = \frac{[\text{HOCl-Cl}]}{[\text{HOCl}][\text{Cl}]} \quad (1)$$

and

$$K_{eq2} = \frac{[\text{RC}_{d-HAT}]}{[\text{HOCl-Cl}][\text{WM}]} \quad (2)$$

Therefore,

$$K_{eq1} \times K_{eq2} = \frac{[\text{RC}_{d-HAT}]}{[\text{HOCl}][\text{Cl}][\text{WM}]} \quad (3)$$

Similarly, for path B<sub>WM</sub>,

$$K_{eq1} \times K_{eq2} = \frac{[Cl - WM]}{[Cl][WM]} \times \frac{[RC_{d-HAT}]}{[Cl - WM][HOCl]} \quad (4)$$

$$K_{eq1} \times K_{eq2} = \frac{[RC_{d-HAT}]}{[Cl][WM][HOCl]} \quad (5)$$

From the equation 3, and 5 it is clear that, the product of  $K_{eq1}$  and  $K_{eq2}$  is same for path  $A_{WM}$ , and  $B_{WM}$ . As the  $k_{uni}$  for path  $A_{WM}$ , and  $B_{WM}$  are also same, it gives same trimolecular rate  $k_t$  for d-HAT paths. Similarly, the  $k_t$  for i-HAT paths (Path  $C_{WM}$  and Path  $D_{WM}$ ) are also found to be same.

Table S1: Comparison of frequencies obtained at CCSD/aug-cc-pVDZ level of theory with frequencies obtained at higher level of theory (CCSD(T)/cc-pVQZ).

| Species         | Frequencies ( $\text{cm}^{-1}$ )          |                                            |
|-----------------|-------------------------------------------|--------------------------------------------|
|                 | CCSD/aug-cc-pVDZ                          | CCSD(T)/cc-pVQZ                            |
| HOCl            | 731<br>1275<br>3791                       | 807<br>1275<br>3844                        |
| TS              | 108<br>457<br>852<br>809<br>1390<br>i4768 | 126<br>331<br>875<br>1006<br>1097<br>i1549 |
| OH              | 3717                                      | 3766                                       |
| Cl <sub>2</sub> | 521                                       | 575                                        |
| HCl             | 2989                                      | 2989                                       |
| ClO             | 806                                       | 903                                        |

Table S2: Contribution of post-CCSD(T) corrections (kcal mol<sup>-1</sup>) to the energy barrier for HOCl + Cl → HCl + ClO reaction.

| Species                           | T1-diagnostic | CCSD(T)/CBS | $\Delta E_T$ | $\Delta E_Q$ | ZPE   | Final  |
|-----------------------------------|---------------|-------------|--------------|--------------|-------|--------|
| TS <sub>uncat</sub>               | 0.0743        | 15.75       | -2.12        | -6.66        | -3.05 | 3.92   |
| RC <sub>uncat</sub>               | -             | -2.76       | -1.53        | -1.76        | 0.45  | -5.60  |
| PC <sub>uncat</sub>               | -             | -7.72       | -0.44        | -0.03        | -1.77 | -9.96  |
| TS <sub>WM</sub>                  | 0.0550        | 0.10        | -0.65        | -0.66        | 0.03  | -1.18  |
| RC <sub>WM</sub>                  | -             | -12.79      | -0.08        | -0.07        | 2.81  | -10.13 |
| PC <sub>WM</sub>                  | -             | -14.66      | -0.45        | -0.68        | 0.20  | -15.59 |
| TS <sub>WM</sub> <sup>d-HAT</sup> | -             | 4.30        | -0.34        | -0.46        | -2.03 | 1.47   |
| RC <sub>WM</sub> <sup>d-HAT</sup> | -             | -9.87       | -1.10        | -0.01        | 2.26  | -8.72  |
| PC <sub>WM</sub> <sup>d-HAT</sup> | -             | -11.77      | -0.29        | -0.03        | -0.57 | -12.66 |
| ClO + HCl                         | -             | -5.60       | -0.42        | -0.02        | -2.86 | -8.90  |
| Cl-WM                             | -             | -3.36       | -0.02        | -0.01        | 0.71  | -2.68  |
| HOCl-WM                           | -             | -7.83       | -0.02        | -0.01        | 2.03  | -5.80  |
| TS <sub>WD</sub>                  | 0.0351        | -           | -            | -            | -     | -      |

\* For the isolated product molecule, we have estimated the CCSD(T)/CBS value using aug-cc-pVn<sub>z</sub> (n= T, Q, 5) basis set.



Table S3: Contribution of post-CCSD(T) corrections (kcal mol<sup>-1</sup>) to the energy barrier for HOCl + Cl → Cl<sub>2</sub> + OH reaction.

| Species              | T1-diagnostic | CCSD(T)/CBS | $\Delta E_T$ | $\Delta E_Q$ | ZPE   | Final  |
|----------------------|---------------|-------------|--------------|--------------|-------|--------|
| TS <sub>uncat</sub>  | 0.0312        | 2.75        | -1.49        | -0.56        | -0.42 | 0.28   |
| RC <sub>uncat</sub>  | -             | -2.76       | -1.53        | -1.76        | 0.45  | -5.60  |
| PC <sub>uncat</sub>  | -             | -1.96       | -0.08        | 0.16         | -1.68 | -3.56  |
| TS <sub>WM</sub>     | 0.0271        | -4.47       | -1.51        | -0.59        | 1.30  | -5.27  |
| RC <sub>WM</sub>     | -             | -13.56      | -0.09        | -0.08        | 2.90  | -10.83 |
| PC <sub>WM</sub>     | -             | -9.81       | -0.08        | 0.14         | 0.54  | -9.21  |
| OH + Cl <sub>2</sub> | -             | -0.70       | -0.07        | 0.17         | -2.15 | -2.75  |
| TS <sub>WD</sub>     | 0.0244        | -           | -            | -            | -     | -      |

\* For the isolated product molecule, we have estimated the CCSD(T)/CBS value using aug-cc-pVn<sub>z</sub> (n= T, Q, 5) basis set.

Table S4: Coordinates (in angstrom) and frequencies (in cm<sup>-1</sup>) of all the important geometries of water catalyzed HOCl + Cl reaction optimized at M062-2X/aug-cc-pVTZ level of theory.

| Species                           | Geometry |          |          |          | Frequencies |           |           |
|-----------------------------------|----------|----------|----------|----------|-------------|-----------|-----------|
| HOCl                              | O        | 0.03597  | 1.08886  | 0.00000  | 806.9529    | 3844.2931 | 1275.9183 |
|                                   | H        | -0.89927 | 1.32415  | 0.00000  |             |           |           |
|                                   | Cl       | 0.03597  | -0.59030 | 0.00000  |             |           |           |
| Cl                                | Cl       | 0.00000  | 0.00000  | 0.00000  |             |           |           |
| HCl                               | H        | 0.00000  | 0.00000  | -1.20783 | 2989.4506   |           |           |
|                                   | Cl       | 0.00000  | 0.00000  | 0.07105  |             |           |           |
| ClO                               | O        | 0.00000  | 0.00000  | -1.06668 | 903.0413    |           |           |
|                                   | Cl       | 0.00000  | 0.00000  | 0.50197  |             |           |           |
| RC <sub>uncat</sub> <sup>R1</sup> | O        | -1.30337 | 1.03832  | -0.00001 | 89.6724     | 158.3457  | 236.7789  |

Table S4: Coordinates (in angstrom) and frequencies (in  $\text{cm}^{-1}$ ) of all the important geometries of water catalyzed HOCl + Cl reaction optimized at M062-2X/aug-cc-pVTZ level of theory.

| Species                  | Geometry                      | Frequencies                   |
|--------------------------|-------------------------------|-------------------------------|
|                          | H -0.41034 1.41930 0.00004    | 801.7847 1322.2712 3736.1667  |
|                          | Cl -1.01876 -0.60511 0.00000  |                               |
|                          | Cl 1.65625 0.03300 0.00000    |                               |
| $\text{TS}_{uncat}^{R1}$ | O -0.54724 0.89825 -0.02064   | 126.5087 331.7842 875.078     |
|                          | H 0.47557 0.50282 0.26728     | 1006.1816 1097.3497 1549.368i |
|                          | Cl -1.62360 -0.30356 0.00048  |                               |
|                          | Cl 1.85315 -0.14872 -0.00649  |                               |
| $\text{PC}_{uncat}^{R1}$ | O -1.03437 1.03002 0.00010    | 48.053 66.5963 131.1955       |
|                          | H 1.00822 0.63556 -0.00140    | 443.4933 917.1332 2884.7996   |
|                          | Cl -1.63255 -0.41684 -0.00002 |                               |
|                          | Cl 2.06000 -0.10526 0.00005   |                               |
| $\text{RC}_{uncat}^{R2}$ | O -1.30334 1.03851 0.00022    | 89.2268 158.3207 231.5424     |
|                          | H -0.41020 1.41926 -0.00163   | 801.5316 1321.4837 3738.624   |
|                          | Cl 1.65647 0.03294 0.00003    |                               |
|                          | Cl -1.01901 -0.60514 -0.00004 |                               |
| $\text{TS}_{uncat}^{R2}$ | O -2.31369 0.24223 -0.12984   | 165.3625 290.8317 441.6887    |
|                          | H -2.41544 0.79203 0.66343    | 834.7253 3786.0868 393.7563i  |
|                          | Cl 1.61825 0.15659 -0.01922   |                               |
|                          | Cl -0.38737 -0.31717 0.04130  |                               |

Table S4: Coordinates (in angstrom) and frequencies (in  $\text{cm}^{-1}$ ) of all the important geometries of water catalyzed HOCl + Cl reaction optimized at M062-2X/aug-cc-pVTZ level of theory.

| Species           | Geometry |          |          | Frequencies |           |           |           |
|-------------------|----------|----------|----------|-------------|-----------|-----------|-----------|
| $PC_{uncat}^{R2}$ | O        | -3.00769 | -0.05902 | 0.00000     | 241.9625  | 61.2672   | 111.6331  |
|                   | H        | -3.23369 | 0.88736  | 0.00000     | 221.578   | 564.4505  | 3756.5557 |
|                   | Cl       | -0.19688 | -0.06467 | 0.00000     |           |           |           |
|                   | Cl       | 1.80248  | 0.04024  | 0.00000     |           |           |           |
| WM                | O        | 0.00000  | 0.00000  | 0.11626     | 1618.6983 | 3867.7173 | 3971.4479 |
|                   | H        | 0.00000  | 0.76310  | -0.46505    |           |           |           |
|                   | H        | 0.00000  | -0.76310 | -0.46505    |           |           |           |
| $RC_{i-HAT}^{WM}$ | O        | -1.57167 | -0.17474 | -0.65232    | 75.863    | 119.1538  | 162.842   |
|                   | H        | -1.35064 | 0.75039  | -0.35713    | 193.9229  | 215.4617  | 265.9002  |
|                   | Cl       | -0.63879 | -1.11714 | 0.32219     | 314.5842  | 524.6308  | 811.6569  |
|                   | O        | -0.55584 | 2.11799  | 0.14721     | 880.2559  | 1464.402  | 1615.9607 |
|                   | H        | -0.69909 | 2.49767  | 1.01751     | 3186.5943 | 3746.3714 | 3921.7235 |
|                   | H        | 0.36381  | 1.81337  | 0.12573     |           |           |           |
|                   | Cl       | 1.73914  | -0.09506 | -0.13073    |           |           |           |
| $TS_{i-HAT}^{WM}$ | O        | -1.59609 | 0.55278  | -0.43437    | 724.3865i | 86.2137   | 161.4383  |
|                   | H        | -0.53686 | 1.47439  | -0.07214    | 218.3153  | 426.9676  | 442.3525  |
|                   | Cl       | -1.16171 | -0.82099 | 0.19292     | 515.917   | 662.3547  | 934.7383  |
|                   | O        | 0.41960  | 1.87079  | 0.10274     | 1243.1465 | 1288.6002 | 1587.991  |
|                   | H        | 0.47455  | 2.21470  | 1.00256     | 1657.58   | 2380.2727 | 3853.0955 |

Table S4: Coordinates (in angstrom) and frequencies (in  $\text{cm}^{-1}$ ) of all the important geometries of water catalyzed HOCl + Cl reaction optimized at M062-2X/aug-cc-pVTZ level of theory.

| Species                  | Geometry |          |          | Frequencies |            |           |           |
|--------------------------|----------|----------|----------|-------------|------------|-----------|-----------|
|                          | H        | 1.05045  | 0.95514  | 0.02515     |            |           |           |
|                          | Cl       | 1.65723  | -0.59270 | -0.09307    |            |           |           |
| $\text{PC}_{i-HAT}^{WM}$ | O        | -1.95958 | 0.42271  | 0.55971     | 20.7306    | 43.4788   | 63.6696   |
|                          | H        | -0.53063 | 1.73118  | 0.07617     | 147.5403   | 176.1524  | 192.2421  |
|                          | Cl       | -1.46314 | -0.82986 | -0.23520    | 285.5938   | 382.5316  | 500.5412  |
|                          | O        | 0.33869  | 1.93252  | -0.29504    | 648.2214   | 929.1171  | 1620.6561 |
|                          | H        | 0.62614  | 2.75511  | 0.10761     | 2572.3806  | 3773.6635 | 3929.4796 |
|                          | H        | 1.42559  | 0.50360  | -0.09946    |            |           |           |
|                          | Cl       | 2.13644  | -0.57201 | 0.10569     |            |           |           |
| $\text{RC}_{d-HAT}^{WM}$ | O        | -1.40607 | -1.22044 | -0.07470    | 47.1034    | 84.0597   | 134.6117  |
|                          | H        | -0.43237 | -1.22656 | -0.05279    | 156.3356   | 168.7461  | 216.1457  |
|                          | Cl       | -1.80062 | 0.40083  | 0.04330     | 385.3151   | 438.7016  | 571.2986  |
|                          | Cl       | 1.78335  | -0.72104 | 0.02834     | 807.1108   | 1357.6524 | 1601.1212 |
|                          | O        | 1.27353  | 1.63839  | -0.14502    | 3657.4664  | 3751.3029 | 3889.7934 |
|                          | H        | 1.46772  | 1.84393  | 0.77614     |            |           |           |
|                          | H        | 0.31851  | 1.48271  | -0.18354    |            |           |           |
| $\text{TS}_{d-HAT}^{WM}$ | O        | -0.63135 | -0.58041 | 0.86876     | 1509.2529i | 73.4949   | 94.471    |
|                          | H        | 0.38439  | -0.27082 | 0.52179     | 112.7289   | 127.6607  | 152.1998  |
|                          | Cl       | -1.70336 | -0.34092 | -0.30102    | 193.1246   | 292.8242  | 376.4326  |
|                          | Cl       | 1.77773  | -0.66112 | -0.14608    | 883.743    | 1123.2523 | 1268.8815 |

Table S4: Coordinates (in angstrom) and frequencies (in  $\text{cm}^{-1}$ ) of all the important geometries of water catalyzed HOCl + Cl reaction optimized at M062-2X/aug-cc-pVTZ level of theory.

| Species                  | Geometry |          |          | Frequencies |           |           |           |
|--------------------------|----------|----------|----------|-------------|-----------|-----------|-----------|
|                          | O        | 0.23486  | 2.15388  | -0.01339    | 1615.3166 | 3835.7536 | 3947.7022 |
|                          | H        | 0.43844  | 2.91494  | 0.53428     |           |           |           |
|                          | H        | 1.08473  | 1.80286  | -0.29839    |           |           |           |
| $\text{PC}_{d-HAT}^{WM}$ | O        | -0.98912 | -0.67324 | 0.95067     | 54.743    | 58.1909   | 87.7672   |
|                          | H        | 0.89600  | -0.67006 | 0.47958     | 95.4365   | 124.646   | 152.3015  |
|                          | Cl       | -1.73109 | -0.36084 | -0.38775    | 172.8969  | 284.0577  | 479.2661  |
|                          | Cl       | 2.03513  | -0.55266 | -0.12566    | 524.0061  | 931.9408  | 1619.0292 |
|                          | O        | 0.07800  | 2.12606  | 0.03179     | 2762.5747 | 3835.3922 | 3947.4029 |
|                          | H        | 0.31304  | 2.88030  | 0.57616     |           |           |           |
|                          | H        | 0.91132  | 1.69659  | -0.18733    |           |           |           |
| Cl-WM                    | O        | 1.62699  | 0.00001  | -0.11797    | 161.919   | 271.5042  | 287.1386  |
|                          | H        | 1.73376  | 0.76614  | 0.45329     | 1606.3837 | 3842.1995 | 3946.4058 |
|                          | H        | 1.73367  | -0.76621 | 0.45324     |           |           |           |
|                          | Cl       | -0.96961 | 0.00000  | 0.00219     |           |           |           |
| HOCl-WM                  | O        | -0.34887 | 1.07876  | -0.00772    | 78.1093   | 96.6376   | 219.9876  |
|                          | H        | 0.59408  | 0.82228  | -0.03818    | 240.9479  | 345.3015  | 638.0965  |
|                          | Cl       | -1.12848 | -0.40392 | 0.01202     | 804.8815  | 1417.692  | 1619.3956 |
|                          | O        | 2.11464  | -0.16727 | -0.07752    | 3572.4075 | 3850.4238 | 3949.349  |
|                          | H        | 2.66841  | -0.18007 | 0.70697     |           |           |           |
|                          | H        | 1.79553  | -1.06737 | -0.19124    |           |           |           |

Table S4: Coordinates (in angstrom) and frequencies (in  $\text{cm}^{-1}$ ) of all the important geometries of water catalyzed HOCl + Cl reaction optimized at M062-2X/aug-cc-pVTZ level of theory.

| Species | Geometry |          |          | Frequencies |           |           |           |
|---------|----------|----------|----------|-------------|-----------|-----------|-----------|
| WD      | O        | 1.50493  | 0.00982  | -0.12097    | 84.5182   | 126.783   | 148.4515  |
|         | H        | 0.55662  | -0.00559 | 0.06345     | 193.5486  | 355.6011  | 606.3369  |
|         | H        | 1.93499  | -0.06114 | 0.73249     | 1618.9862 | 1635.644  | 3772.5038 |
|         | O        | -1.38612 | -0.00794 | 0.11167     | 3859.7328 | 3944.091  | 3958.8595 |
|         | H        | -1.72382 | -0.73758 | -0.41341    |           |           |           |
|         | H        | -1.71831 | 0.78930  | -0.30811    |           |           |           |
| HOCl-WD | Cl       | -1.33505 | -0.63573 | -0.09040    | 18.2803   | 103.4993  | 128.9525  |
|         | O        | -1.26447 | 1.00579  | 0.21457     | 165.7504  | 214.6606  | 234.0733  |
|         | H        | -0.31827 | 1.23831  | 0.04037     | 252.352   | 292.1205  | 382.7812  |
|         | O        | 1.33986  | 1.45708  | -0.20659    | 478.6093  | 708.7312  | 795.1208  |
|         | H        | 1.78055  | 2.05884  | 0.39695     | 807.5074  | 1499.4319 | 1619.4836 |
|         | H        | 1.76015  | 0.58536  | -0.09233    | 1637.9569 | 3299.4881 | 3613.089  |
|         | O        | 1.94592  | -1.20111 | 0.17655     | 3801.4269 | 3923.5747 | 3931.6017 |
|         | H        | 2.30098  | -1.77137 | -0.50923    |           |           |           |
|         | H        | 1.00187  | -1.39782 | 0.22472     |           |           |           |
| Cl-WD   | O        | -0.14910 | -1.48862 | -0.11538    | 129.209   | 184.1303  | 211.7959  |
|         | H        | 0.04676  | -1.78675 | 0.77872     | 227.4683  | 236.4189  | 375.8135  |
|         | H        | -0.94064 | -0.91814 | -0.04628    | 430.7331  | 442.2501  | 838.89    |
|         | O        | -1.94280 | 0.57675  | 0.09908     | 1612.5112 | 1616.7818 | 3535.6976 |
|         | H        | -2.54668 | 0.87925  | -0.58295    | 3804.1636 | 3888.5503 | 3934.6721 |

Table S4: Coordinates (in angstrom) and frequencies (in  $\text{cm}^{-1}$ ) of all the important geometries of water catalyzed HOCl + Cl reaction optimized at M062-2X/aug-cc-pVTZ level of theory.

| Species                  | Geometry |          |          | Frequencies |           |           |           |
|--------------------------|----------|----------|----------|-------------|-----------|-----------|-----------|
|                          | H        | -1.17136 | 1.15582  | 0.05696     |           |           |           |
|                          | Cl       | 1.25571  | 0.46852  | -0.00447    |           |           |           |
| $\text{RC}_{i-HAT}^{WD}$ | Cl       | -0.47063 | -1.24336 | 0.62076     | 25.8978   | 57.6396   | 79.9746   |
|                          | O        | 0.56804  | -1.75725 | -0.53234    | 120.2476  | 162.5472  | 195.4498  |
|                          | H        | 1.32779  | -1.08958 | -0.48882    | 229.9189  | 240.1962  | 287.5002  |
|                          | O        | 2.38494  | 0.04174  | -0.29971    | 322.0224  | 352.0703  | 518.0203  |
|                          | H        | 2.92006  | 0.25631  | -1.06693    | 557.909   | 831.034   | 836.3702  |
|                          | H        | 1.94293  | 0.87408  | -0.01701    | 942.0089  | 1584.1732 | 1618.9837 |
|                          | O        | 0.94855  | 2.19736  | 0.40783     | 1649.3538 | 2889.547  | 3405.3369 |
|                          | H        | 0.90717  | 2.52361  | 1.30946     | 3695.9158 | 3918.4315 | 3924.1008 |
|                          | H        | 0.04227  | 1.94502  | 0.16819     |           |           |           |
|                          | Cl       | -1.78540 | 0.75135  | -0.41553    |           |           |           |
| $\text{TS}_{i-HAT}^{WD}$ | Cl       | 0.36368  | -1.39899 | 0.42761     | 491.2961i | 44.7438   | 67.7795   |
|                          | O        | 1.62382  | -1.07947 | -0.45983    | 89.8448   | 139.1645  | 218.8028  |
|                          | H        | 1.84250  | 0.35468  | -0.30075    | 344.4222  | 357.0691  | 432.6861  |
|                          | O        | 1.83493  | 1.38812  | -0.17169    | 527.2556  | 601.3539  | 701.8984  |
|                          | H        | 2.20156  | 1.79675  | -0.96074    | 807.7838  | 941.2957  | 999.4774  |
|                          | H        | 0.67081  | 1.78277  | 0.10198     | 1118.4607 | 1476.0798 | 1591.4069 |
|                          | O        | -0.40586 | 2.09384  | 0.34731     | 1659.5166 | 1754.0663 | 2338.8197 |
|                          | H        | -0.52421 | 2.26818  | 1.28741     | 2481.5618 | 3870.4953 | 3895.9488 |
|                          | H        | -1.04945 | 1.30738  | 0.08808     |           |           |           |

Table S4: Coordinates (in angstrom) and frequencies (in  $\text{cm}^{-1}$ ) of all the important geometries of water catalyzed HOCl + Cl reaction optimized at M062-2X/aug-cc-pVTZ level of theory.

| Species                  | Geometry |          |          | Frequencies |           |           |           |
|--------------------------|----------|----------|----------|-------------|-----------|-----------|-----------|
|                          | Cl       | -1.98511 | -0.17335 | -0.30657    |           |           |           |
| $\text{PC}_{i-HAT}^{WD}$ | Cl       | 0.54962  | -1.23701 | 0.02509     | 9.2639    | 47.3511   | 79.6002   |
|                          | O        | 2.11675  | -1.30317 | 0.04925     | 105.1728  | 128.0813  | 154.8037  |
|                          | H        | 2.39376  | 0.65838  | -0.01842    | 163.7249  | 191.4608  | 249.3609  |
|                          | O        | 2.09820  | 1.57953  | -0.03623    | 262.8686  | 311.6225  | 402.359   |
|                          | H        | 2.65847  | 2.03456  | -0.66832    | 494.5436  | 670.6672  | 747.4139  |
|                          | H        | 0.32327  | 1.86120  | -0.01111    | 885.8035  | 910.7151  | 1619.0844 |
|                          | O        | -0.63486 | 2.04670  | 0.03223     | 1645.6292 | 2179.6272 | 3566.1657 |
|                          | H        | -0.77087 | 2.59026  | 0.81185     | 3754.4386 | 3915.0384 | 3931.5157 |
|                          | H        | -1.63121 | 0.76416  | -0.02690    |           |           |           |
|                          | Cl       | -2.40928 | -0.32141 | -0.05151    |           |           |           |
| $\text{RC}_{d-HAT}^{WD}$ | O        | -1.27899 | 0.86180  | 0.37061     | 20.2499   | 33.3182   | 50.4435   |
|                          | H        | -0.58576 | 0.49769  | 0.95127     | 58.5402   | 169.833   | 189.4119  |
|                          | Cl       | -2.19866 | -0.45628 | -0.10712    | 212.5124  | 269.712   | 281.6673  |
|                          | Cl       | 1.44498  | -1.40966 | -0.28657    | 356.7602  | 381.1579  | 456.1364  |
|                          | O        | 1.07565  | 1.88073  | -1.00126    | 549.2296  | 786.4796  | 807.4416  |
|                          | H        | 0.12385  | 1.73040  | -0.90966    | 890.657   | 1348.0952 | 1660.1779 |
|                          | O        | 1.25705  | 0.57496  | 1.35138     | 1713.5868 | 3424.1577 | 3631.3963 |
|                          | H        | 2.01149  | 0.54291  | 1.94385     | 3714.8232 | 3876.3994 | 3879.0151 |
|                          | H        | 1.36644  | 1.24192  | -1.65870    |           |           |           |
|                          | H        | 1.46683  | 1.16808  | 0.60003     |           |           |           |



Table S4: Coordinates (in angstrom) and frequencies (in  $\text{cm}^{-1}$ ) of all the important geometries of water catalyzed HOCl + Cl reaction optimized at M062-2X/aug-cc-pVTZ level of theory.

| Species                  | Geometry |          |          | Frequencies |            |           |           |
|--------------------------|----------|----------|----------|-------------|------------|-----------|-----------|
| $\text{TS}_{d-HAT}^{WD}$ | O        | 1.01197  | 0.13955  | 0.92790     | 1507.8788i | 15.716    | 64.7546   |
|                          | H        | 0.12234  | 0.39874  | 0.30069     | 89.4853    | 124.8363  | 140.4016  |
|                          | Cl       | 2.23497  | -0.25445 | -0.02341    | 151.127    | 159.0258  | 201.583   |
|                          | Cl       | -0.73096 | 1.60448  | -0.33778    | 213.9753   | 230.0117  | 328.1812  |
|                          | O        | -0.41161 | -1.79034 | -0.56801    | 356.2965   | 425.6384  | 691.1998  |
|                          | H        | -0.54326 | -1.83960 | -1.51696    | 890.7141   | 1160.7769 | 1319.7806 |
|                          | H        | -1.29663 | -1.64254 | -0.19966    | 1614.4975  | 1647.9451 | 3705.1439 |
|                          | O        | -2.85527 | -0.75469 | 0.39461     | 3786.7537  | 3927.1341 | 3937.8895 |
|                          | H        | -3.29492 | -0.76507 | 1.24709     |            |           |           |
|                          | H        | -2.51637 | 0.14186  | 0.27305     |            |           |           |
| $\text{PC}_{d-HAT}^{WD}$ | O        | 2.34481  | -0.00347 | 0.62357     | 22.7745    | 43.821    | 54.2518   |
|                          | H        | -1.66705 | 0.07949  | -0.50975    | 79.4669    | 97.2976   | 163.0378  |
|                          | Cl       | 1.58546  | 0.70115  | -0.54964    | 175.1614   | 232.1637  | 265.7934  |
|                          | Cl       | -1.94054 | 1.01007  | 0.40308     | 302.2786   | 358.4864  | 398.4555  |
|                          | O        | -1.10487 | -1.21617 | -1.37750    | 525.5505   | 615.9203  | 749.2695  |
|                          | H        | -1.76146 | -1.85282 | -1.67017    | 925.8244   | 939.2896  | 1623.3585 |
|                          | H        | -0.64302 | -1.61136 | -0.61080    | 1631.0446  | 2262.0501 | 3537.4767 |
|                          | O        | -0.01825 | -1.69588 | 1.08422     | 3788.0832  | 3865.135  | 3911.5969 |
|                          | H        | 0.89175  | -1.38270 | 1.16214     |            |           |           |
|                          | H        | -0.55741 | -0.99919 | 1.47767     |            |           |           |

Table S4: Coordinates (in angstrom) and frequencies (in  $\text{cm}^{-1}$ ) of all the important geometries of water catalyzed HOCl + Cl reaction optimized at M062-2X/aug-cc-pVTZ level of theory.

| Species          | Geometry |          |          | Frequencies |           |           |           |
|------------------|----------|----------|----------|-------------|-----------|-----------|-----------|
| $\text{RC}_{WM}$ | O        | -1.57070 | 0.10802  | 0.52510     | 55.9664   | 108.1918  | 134.8802  |
|                  | H        | -1.06857 | 0.91411  | 0.21793     | 186.709   | 207.6774  | 272.6783  |
|                  | Cl       | 1.68546  | -0.31299 | 0.11462     | 384.9775  | 496.8982  | 791.4066  |
|                  | Cl       | -0.79200 | -1.12731 | -0.24196    | 823.9843  | 1522.3402 | 1615.5672 |
|                  | O        | -0.24715 | 2.23268  | -0.28426    | 3129.9548 | 3765.3707 | 3917.6847 |
|                  | H        | 0.65026  | 1.87030  | -0.30534    |           |           |           |
|                  | H        | -0.22775 | 2.97491  | 0.32551     |           |           |           |
| $\text{TS}_{WM}$ | O        | 1.46071  | 1.37220  | 0.27222     | i456.5402 | 37.4218   | 64.4879   |
|                  | H        | 2.00104  | 0.55691  | 0.18176     | 91.285    | 162.2598  | 212.4587  |
|                  | Cl       | -0.33201 | 0.61398  | -0.23223    | 237.3565  | 279.5358  | 427.6918  |
|                  | O        | 2.65805  | -1.14980 | -0.07788    | 661.6207  | 996.3597  | 1618.484  |
|                  | H        | 2.91948  | -1.65797 | 0.69390     | 3543.7461 | 3854.8696 | 3953.8345 |
|                  | H        | 2.00741  | -1.68571 | -0.53949    |           |           |           |
|                  | Cl       | -2.01376 | -0.55472 | 0.12100     |           |           |           |
| $\text{PC}_{WM}$ | O        | -2.22582 | -1.39909 | 0.01975     | 55.9664   | 108.1918  | 134.8802  |
|                  | H        | -2.49932 | -0.45634 | -0.02231    | 186.709   | 207.6774  | 272.6783  |
|                  | Cl       | 0.36719  | -0.50187 | -0.00632    | 384.9775  | 496.8982  | 791.4066  |
|                  | O        | -2.38520 | 1.39668  | -0.07334    | 823.9843  | 1522.3402 | 1615.5672 |
|                  | H        | -2.82831 | 2.07120  | 0.44595     | 3129.9548 | 3765.3707 | 3917.6847 |
|                  | H        | -1.44090 | 1.55904  | 0.01384     |           |           |           |
|                  | Cl       | 2.20084  | 0.31631  | 0.00580     |           |           |           |

Table S4: Coordinates (in angstrom) and frequencies (in  $\text{cm}^{-1}$ ) of all the important geometries of water catalyzed HOCl + Cl reaction optimized at M062-2X/aug-cc-pVTZ level of theory.

| Species          | Geometry |          |          | Frequencies |           |           |           |
|------------------|----------|----------|----------|-------------|-----------|-----------|-----------|
| $\text{RC}_{WD}$ | O        | -0.56766 | -1.75743 | -0.53271    | 25.9748   | 57.5569   | 79.929    |
|                  | H        | -1.32755 | -1.09005 | -0.48878    | 120.1433  | 162.6103  | 195.1653  |
|                  | Cl       | 0.47096  | -1.24375 | 0.62050     | 229.7592  | 240.0485  | 287.079   |
|                  | O        | -2.38494 | 0.04122  | -0.29901    | 321.4055  | 351.6481  | 517.4211  |
|                  | H        | -2.92242 | 0.25505  | -1.06477    | 557.365   | 831.0823  | 835.691   |
|                  | H        | -1.94375 | 0.87408  | -0.01692    | 941.1577  | 1583.9811 | 1618.8323 |
|                  | Cl       | 1.78533  | 0.75191  | -0.41514    | 1649.0544 | 2890.7104 | 3406.8051 |
|                  | O        | -0.94905 | 2.19770  | 0.40721     | 3696.5068 | 3918.6845 | 3924.3913 |
|                  | H        | -0.90717 | 2.52533  | 1.30830     |           |           |           |
|                  | H        | -0.04296 | 1.94508  | 0.16728     |           |           |           |
| $\text{TS}_{WD}$ | O        | 1.27586  | -1.92809 | 0.10367     | 456.1179i | 33.4038   | 80.9132   |
|                  | H        | 1.87869  | -1.13507 | 0.10823     | 120.5342  | 135.893   | 141.5645  |
|                  | Cl       | -0.45862 | -0.96694 | -0.24599    | 169.1356  | 208.7464  | 237.3289  |
|                  | O        | 2.61698  | 0.40333  | 0.09006     | 263.8643  | 285.0603  | 398.9102  |
|                  | H        | 3.19178  | 0.65385  | 0.81598     | 413.3015  | 449.2164  | 742.5789  |
|                  | H        | 1.93817  | 1.10090  | 0.02239     | 779.1155  | 1091.4544 | 1621.785  |
|                  | Cl       | -2.07832 | 0.28859  | 0.19216     | 1645.5119 | 3246.55   | 3588.0664 |
|                  | O        | 0.59325  | 2.30169  | -0.09262    | 3800.8694 | 3926.2288 | 3927.3052 |
|                  | H        | 0.50421  | 2.78489  | -0.91753    |           |           |           |
|                  | H        | -0.27351 | 1.91210  | 0.07710     |           |           |           |

Table S4: Coordinates (in angstrom) and frequencies (in  $\text{cm}^{-1}$ ) of all the important geometries of water catalyzed HOCl + Cl reaction optimized at M062-2X/aug-cc-pVTZ level of theory.

| Species          | Geometry                    | Frequencies                   |
|------------------|-----------------------------|-------------------------------|
| $\text{PC}_{WD}$ | O -1.98909 -1.92815 0.04832 | 24.6979 57.8359 59.8256       |
|                  | H -2.30207 -0.98939 0.02318 | 76.7187 109.1178 119.7159     |
|                  | Cl 0.46548 -0.94942 0.03384 | 147.7149 189.3566 206.8126    |
|                  | O -2.57860 0.74497 -0.03064 | 222.8287 258.024 337.866      |
|                  | H -3.21390 1.15788 -0.61817 | 417.9453 492.851 539.3948     |
|                  | H -1.78540 1.30927 -0.03844 | 705.9786 822.4079 1618.9271   |
|                  | Cl 2.22873 0.02489 -0.05002 | 1645.2621 3402.9243 3635.7951 |
|                  | O -0.29243 2.37443 0.01186  | 3830.6343 3931.5923 3934.1674 |
|                  | H -0.13861 2.81825 0.84952  |                               |
|                  | H 0.51950 1.89110 -0.17727  |                               |
| OH               | O 0.00000 0.00000 0.10800   | 3766.227                      |
|                  | H 0.00000 0.00000 -0.86397  |                               |
| $\text{Cl}_2$    | Cl 0.00000 0.00000 0.99755  | 575.8253                      |
|                  | Cl 0.00000 0.00000 -0.99755 |                               |

Table S5: Zero curvature tunneling (ZCT) correction for uncatalyzed, water and water dimer catalyzed for  $\text{HOCl} + \text{Cl} \rightarrow \text{Cl}_2 + \text{OH}$  reaction

| Temp (K) | $\kappa_{\text{uncat}}^{\text{ZCT}}$ | $\kappa_{\text{WM}}^{\text{ZCT}}$ | $\kappa_{\text{WD}}^{\text{ZCT}}$ |
|----------|--------------------------------------|-----------------------------------|-----------------------------------|
| 213      | 1.40                                 | 1.33                              | 1.51                              |
| 216      | 1.38                                 | 1.32                              | 1.49                              |
| 219      | 1.37                                 | 1.31                              | 1.48                              |
| 224      | 1.35                                 | 1.29                              | 1.45                              |
| 235      | 1.31                                 | 1.26                              | 1.40                              |
| 250      | 1.27                                 | 1.23                              | 1.34                              |
| 259      | 1.25                                 | 1.21                              | 1.31                              |
| 280      | 1.21                                 | 1.18                              | 1.26                              |
| 290      | 1.19                                 | 1.16                              | 1.24                              |
| 298      | 1.18                                 | 1.15                              | 1.23                              |
| 300      | 1.18                                 | 1.15                              | 1.22                              |
| 310      | 1.17                                 | 1.14                              | 1.21                              |
| 320      | 1.15                                 | 1.13                              | 1.19                              |

Table S6: Comparison of energy barrier barrier obtained for  $\text{TS}_{\text{uncat}}$  using different methods.

| Method                                    | Barrier (kcal mol <sup>-1</sup> ) |
|-------------------------------------------|-----------------------------------|
| CCSD(T)/cc-pVQZ                           | 15.00                             |
| CCSD(T)/aug-cc-pVTZ//CCSD/aug-cc-pVDZ     | 15.62                             |
| CCSD(T)/aug-cc-pVQZ//CCSD/aug-cc-pVDZ     | 15.70                             |
| CCSD(T)/aug-cc-pVTZ//M062X/aug-cc-pVTZ    | 10.16                             |
| CCSD(T)/aug-cc-pVTZ//MP2/aug-cc-pVTZ      | 10.92                             |
| CCSD(T)/aug-cc-pVTZ//wB97XD/aug-cc-pVTZ   | 10.53                             |
| CCSD(T)/aug-cc-pVTZ//LC-wHPBE/aug-cc-pVTZ | 10.24                             |

Table S7: Bimolecular rate constant  $k_{bi}$  (in  $\text{cm}^3 \text{ molecule}^{-1} \text{ s}^{-1}$ ) for  $\text{H}_2\text{O}$  catalyzed and uncatalyzed  $\text{HOCl} + \text{Cl}^\bullet \rightarrow \text{ClO}^\bullet + \text{HCl}$  reaction within temperature range 213-320 K.

| Temp (K) | Path A                 | Path B                 | Path C                 | Path D                 | Uncat                  |
|----------|------------------------|------------------------|------------------------|------------------------|------------------------|
| 213      | $1.65 \times 10^{-17}$ | $2.48 \times 10^{-15}$ | $5.19 \times 10^{-15}$ | $1.45 \times 10^{-13}$ | $4.98 \times 10^{-14}$ |
| 216      | $1.57 \times 10^{-17}$ | $2.15 \times 10^{-15}$ | $4.62 \times 10^{-15}$ | $1.16 \times 10^{-13}$ | $4.67 \times 10^{-14}$ |
| 219      | $1.49 \times 10^{-17}$ | $1.88 \times 10^{-15}$ | $4.15 \times 10^{-15}$ | $9.45 \times 10^{-14}$ | $4.40 \times 10^{-14}$ |
| 224      | $1.38 \times 10^{-17}$ | $1.51 \times 10^{-15}$ | $3.54 \times 10^{-15}$ | $6.85 \times 10^{-14}$ | $4.03 \times 10^{-14}$ |
| 235      | $1.20 \times 10^{-17}$ | $9.88 \times 10^{-16}$ | $2.66 \times 10^{-15}$ | $3.69 \times 10^{-14}$ | $3.47 \times 10^{-14}$ |
| 250      | $1.05 \times 10^{-17}$ | $6.11 \times 10^{-16}$ | $2.01 \times 10^{-15}$ | $1.88 \times 10^{-14}$ | $3.06 \times 10^{-14}$ |
| 259      | $9.98 \times 10^{-18}$ | $4.79 \times 10^{-16}$ | $1.79 \times 10^{-15}$ | $1.34 \times 10^{-14}$ | $2.94 \times 10^{-14}$ |
| 280      | $9.42 \times 10^{-18}$ | $3.05 \times 10^{-16}$ | $1.50 \times 10^{-15}$ | $7.15 \times 10^{-15}$ | $2.87 \times 10^{-14}$ |
| 290      | $9.43 \times 10^{-18}$ | $2.58 \times 10^{-16}$ | $1.42 \times 10^{-15}$ | $5.62 \times 10^{-15}$ | $2.92 \times 10^{-14}$ |
| 298      | $9.53 \times 10^{-18}$ | $2.30 \times 10^{-16}$ | $1.38 \times 10^{-15}$ | $4.74 \times 10^{-15}$ | $2.99 \times 10^{-14}$ |
| 300      | $9.56 \times 10^{-18}$ | $2.24 \times 10^{-16}$ | $1.37 \times 10^{-15}$ | $4.55 \times 10^{-15}$ | $3.01 \times 10^{-14}$ |
| 310      | $9.84 \times 10^{-18}$ | $1.99 \times 10^{-16}$ | $1.34 \times 10^{-15}$ | $3.78 \times 10^{-15}$ | $3.12 \times 10^{-14}$ |
| 320      | $1.02 \times 10^{-17}$ | $1.81 \times 10^{-16}$ | $1.32 \times 10^{-15}$ | $3.20 \times 10^{-15}$ | $3.27 \times 10^{-14}$ |

Table S8: Bimolecular rate constant  $k_{bi}$  (in  $\text{cm}^3 \text{ molecule}^{-1} \text{ s}^{-1}$ ) for  $\text{H}_2\text{O}$ , and  $(\text{H}_2\text{O})_2$  catalyzed and uncatalyzed  $\text{HOCl} + \text{Cl}^\bullet \rightarrow \text{OH}^\bullet + \text{Cl}_2$  reaction within temperature range 213-320 K.

| Temp (K) | $\text{H}_2\text{O}$   |                        | $(\text{H}_2\text{O})_2$ |                        | Uncat                  |
|----------|------------------------|------------------------|--------------------------|------------------------|------------------------|
|          | Path A                 | Path B                 | Path A                   | Path B                 |                        |
| 213      | $1.10 \times 10^{-10}$ | $2.44 \times 10^{-13}$ | $8.03 \times 10^{-11}$   | $4.03 \times 10^{-13}$ | $4.35 \times 10^{-13}$ |
| 216      | $1.02 \times 10^{-10}$ | $2.56 \times 10^{-13}$ | $6.70 \times 10^{-11}$   | $4.22 \times 10^{-13}$ | $4.35 \times 10^{-13}$ |
| 219      | $9.53 \times 10^{-11}$ | $2.68 \times 10^{-13}$ | $5.62 \times 10^{-11}$   | $4.41 \times 10^{-13}$ | $4.36 \times 10^{-13}$ |
| 224      | $8.51 \times 10^{-11}$ | $2.90 \times 10^{-13}$ | $4.24 \times 10^{-11}$   | $4.75 \times 10^{-13}$ | $4.38 \times 10^{-13}$ |
| 235      | $6.78 \times 10^{-11}$ | $3.42 \times 10^{-13}$ | $2.38 \times 10^{-11}$   | $5.55 \times 10^{-13}$ | $4.44 \times 10^{-13}$ |
| 250      | $5.18 \times 10^{-11}$ | $4.21 \times 10^{-13}$ | $1.19 \times 10^{-11}$   | $6.80 \times 10^{-13}$ | $4.55 \times 10^{-13}$ |
| 259      | $4.50 \times 10^{-11}$ | $4.73 \times 10^{-13}$ | $8.20 \times 10^{-12}$   | $7.64 \times 10^{-13}$ | $4.62 \times 10^{-13}$ |
| 280      | $3.40 \times 10^{-11}$ | $6.11 \times 10^{-13}$ | $3.80 \times 10^{-12}$   | $9.90 \times 10^{-13}$ | $4.83 \times 10^{-13}$ |
| 290      | $3.03 \times 10^{-11}$ | $6.84 \times 10^{-13}$ | $2.76 \times 10^{-12}$   | $1.11 \times 10^{-12}$ | $4.94 \times 10^{-13}$ |
| 298      | $2.79 \times 10^{-11}$ | $7.46 \times 10^{-13}$ | $2.17 \times 10^{-12}$   | $1.22 \times 10^{-12}$ | $5.03 \times 10^{-13}$ |
| 300      | $2.74 \times 10^{-11}$ | $7.62 \times 10^{-13}$ | $2.05 \times 10^{-12}$   | $1.25 \times 10^{-12}$ | $5.05 \times 10^{-13}$ |
| 310      | $2.49 \times 10^{-11}$ | $8.45 \times 10^{-13}$ | $1.55 \times 10^{-12}$   | $1.39 \times 10^{-12}$ | $5.18 \times 10^{-13}$ |
| 320      | $2.29 \times 10^{-11}$ | $9.33 \times 10^{-13}$ | $1.20 \times 10^{-12}$   | $1.54 \times 10^{-12}$ | $5.31 \times 10^{-13}$ |



Table S9: Values of rate constants  $k_{HL}^{TST}$  in  $\text{cm}^3 \text{ molecule}^{-1} \text{ s}^{-1}$ , transmission coefficient ( $\Gamma_{LL}$ ), and ZCT and SCT tunneling correction for bare  $\text{HOCl} + \text{Cl} \rightarrow \text{HCl} + \text{ClO}$  reaction.

| Temp (K) | $k_{HL}^{TST}$     | $\Gamma_{LL}$ | $\kappa_{LL}^{ZCT}$ | $\kappa_{LL}^{SCT}$ |
|----------|--------------------|---------------|---------------------|---------------------|
| 213      | $2.13 \times 10^2$ | 0.88          | $1.72 \times 10^3$  | $2.04 \times 10^3$  |
| 216      | $2.16 \times 10^2$ | 0.88          | $1.53 \times 10^3$  | $1.81 \times 10^3$  |
| 219      | $2.19 \times 10^2$ | 0.88          | $1.37 \times 10^3$  | $1.62 \times 10^3$  |
| 224      | $2.24 \times 10^2$ | 0.88          | $1.14 \times 10^3$  | $1.35 \times 10^3$  |
| 235      | $2.35 \times 10^2$ | 0.88          | $7.83 \times 10^2$  | $9.25 \times 10^2$  |
| 250      | $2.50 \times 10^2$ | 0.88          | $4.96 \times 10^2$  | $5.84 \times 10^2$  |
| 259      | $2.59 \times 10^2$ | 0.88          | $3.86 \times 10^2$  | $4.55 \times 10^2$  |
| 280      | $2.80 \times 10^2$ | 0.88          | $2.30 \times 10^2$  | $2.70 \times 10^2$  |
| 290      | $2.90 \times 10^2$ | 0.88          | $1.85 \times 10^2$  | $2.16 \times 10^2$  |
| 298      | $2.98 \times 10^2$ | 0.88          | $1.57 \times 10^2$  | $1.83 \times 10^2$  |
| 300      | $3.00 \times 10^2$ | 0.88          | $1.50 \times 10^2$  | $1.76 \times 10^2$  |
| 310      | $3.10 \times 10^2$ | 0.88          | $1.24 \times 10^2$  | $1.45 \times 10^2$  |
| 320      | $3.20 \times 10^2$ | 0.88          | $1.04 \times 10^2$  | $1.21 \times 10^2$  |
| 320      | $3.20 \times 10^2$ | 1.15          | $1.04 \times 10^2$  | $1.21 \times 10^2$  |

Table S10: Comparison of energetics obtained at different level of theory for HOCl + Cl → HCl + ClO reaction.

| Species             | CCSD(T)/CBS//M062X/aug-cc-pVTZ | CCSD(T)/CBS//CCSD/aug-cc-pVDZ | CCSDT(Q)/CBS//CCSD/aug-cc-pVDZ |
|---------------------|--------------------------------|-------------------------------|--------------------------------|
| TS <sub>uncat</sub> | 9.94                           | 15.75                         | 6.97                           |
| TS <sub>WM</sub>    | -1                             | 0.10                          | -1.21                          |
| RC <sub>uncat</sub> | -3.34                          | -2.76                         | -6.05                          |
| RC <sub>WM</sub>    | -14.8                          | -12.79                        | -12.94                         |
| PC <sub>uncat</sub> | -8.33                          | -7.72                         | -8.19                          |
| PC <sub>WM</sub>    | -15.3                          | -14.66                        | -15.79                         |

Table S11: Bimolecular rate constant  $k_{bi}$  (in  $\text{cm}^3 \text{ molecule}^{-1} \text{ s}^{-1}$ ) for  $(\text{H}_2\text{O})_2$  catalyzed and uncatalyzed  $\text{HOCl} + \text{Cl}^\bullet \rightarrow \text{ClO}^\bullet + \text{HCl}$  reaction within temperature range 213-320 K.

| Temp (K) | Path A                 | Path B                 | Path C                 | Uncat                  |
|----------|------------------------|------------------------|------------------------|------------------------|
| 213      | $1.87 \times 10^{-17}$ | $1.20 \times 10^{-16}$ | $4.91 \times 10^{-15}$ | $4.98 \times 10^{-14}$ |
| 216      | $1.71 \times 10^{-17}$ | $1.34 \times 10^{-16}$ | $4.77 \times 10^{-15}$ | $4.67 \times 10^{-14}$ |
| 219      | $1.58 \times 10^{-17}$ | $1.50 \times 10^{-16}$ | $4.63 \times 10^{-15}$ | $4.40 \times 10^{-14}$ |
| 224      | $1.40 \times 10^{-17}$ | $1.79 \times 10^{-16}$ | $4.42 \times 10^{-15}$ | $4.03 \times 10^{-14}$ |
| 235      | $1.16 \times 10^{-17}$ | $2.58 \times 10^{-16}$ | $4.01 \times 10^{-15}$ | $3.47 \times 10^{-14}$ |
| 250      | $1.02 \times 10^{-17}$ | $4.04 \times 10^{-16}$ | $3.58 \times 10^{-15}$ | $3.06 \times 10^{-14}$ |
| 259      | $9.94 \times 10^{-18}$ | $5.16 \times 10^{-16}$ | $3.37 \times 10^{-15}$ | $2.94 \times 10^{-14}$ |
| 280      | $1.06 \times 10^{-17}$ | $8.76 \times 10^{-16}$ | $3.02 \times 10^{-15}$ | $2.87 \times 10^{-14}$ |
| 290      | $1.13 \times 10^{-17}$ | $1.09 \times 10^{-15}$ | $2.86 \times 10^{-15}$ | $2.92 \times 10^{-14}$ |
| 298      | $1.20 \times 10^{-17}$ | $1.29 \times 10^{-15}$ | $2.75 \times 10^{-15}$ | $2.99 \times 10^{-14}$ |
| 300      | $1.22 \times 10^{-17}$ | $1.34 \times 10^{-15}$ | $2.72 \times 10^{-15}$ | $3.01 \times 10^{-14}$ |
| 310      | $1.34 \times 10^{-17}$ | $1.62 \times 10^{-15}$ | $2.60 \times 10^{-15}$ | $3.12 \times 10^{-14}$ |
| 320      | $1.48 \times 10^{-17}$ | $1.95 \times 10^{-15}$ | $2.50 \times 10^{-15}$ | $3.27 \times 10^{-14}$ |

Table S12: Termolecular rate constant ( $\text{cm}^6 \text{ molecule}^{-2} \text{ s}^{-1}$ ) for water catalyzed  $\text{HOCl} + \text{Cl}^\bullet \rightarrow \text{HCl} + \text{ClO}^\bullet$  reaction within temperature range of 213 K - 320 K.

| Temp (K) | WM                     |                        | WD                     |                        |
|----------|------------------------|------------------------|------------------------|------------------------|
|          | i-HAT                  | d-HAT                  | i-HAT                  | d-HAT                  |
| 213      | $8.56 \times 10^{-34}$ | $3.62 \times 10^{-37}$ | $1.68 \times 10^{-34}$ | $1.32 \times 10^{-37}$ |
| 216      | $6.69 \times 10^{-34}$ | $3.02 \times 10^{-37}$ | $1.35 \times 10^{-34}$ | $1.09 \times 10^{-37}$ |
| 219      | $5.28 \times 10^{-34}$ | $2.53 \times 10^{-37}$ | $1.09 \times 10^{-34}$ | $9.02 \times 10^{-38}$ |
| 224      | $3.63 \times 10^{-34}$ | $1.92 \times 10^{-37}$ | $7.69 \times 10^{-35}$ | $6.78 \times 10^{-38}$ |
| 235      | $1.72 \times 10^{-34}$ | $1.11 \times 10^{-37}$ | $3.79 \times 10^{-35}$ | $3.98 \times 10^{-38}$ |
| 250      | $7.25 \times 10^{-35}$ | $5.99 \times 10^{-38}$ | $1.60 \times 10^{-35}$ | $2.30 \times 10^{-38}$ |
| 259      | $4.63 \times 10^{-35}$ | $4.37 \times 10^{-38}$ | $9.98 \times 10^{-36}$ | $1.79 \times 10^{-38}$ |
| 280      | $1.90 \times 10^{-35}$ | $2.41 \times 10^{-38}$ | $3.77 \times 10^{-36}$ | $1.19 \times 10^{-38}$ |
| 290      | $1.33 \times 10^{-35}$ | $1.93 \times 10^{-38}$ | $2.49 \times 10^{-36}$ | $1.04 \times 10^{-38}$ |
| 298      | $1.03 \times 10^{-35}$ | $1.65 \times 10^{-38}$ | $1.83 \times 10^{-36}$ | $9.61 \times 10^{-39}$ |
| 300      | $9.64 \times 10^{-36}$ | $1.60 \times 10^{-38}$ | $1.70 \times 10^{-36}$ | $9.44 \times 10^{-39}$ |
| 310      | $7.19 \times 10^{-36}$ | $1.36 \times 10^{-38}$ | $1.19 \times 10^{-36}$ | $8.77 \times 10^{-39}$ |
| 320      | $5.51 \times 10^{-36}$ | $1.19 \times 10^{-38}$ | $8.50 \times 10^{-37}$ | $8.31 \times 10^{-39}$ |
| 320      | $5.51 \times 10^{-36}$ | $1.19 \times 10^{-38}$ | $8.50 \times 10^{-37}$ | $8.31 \times 10^{-39}$ |

Table S13: Termolecular rate constant ( $\text{cm}^6 \text{ molecule}^{-2} \text{ s}^{-1}$ ) for water catalyzed  $\text{HOCl} + \text{Cl}^\bullet \longrightarrow \text{Cl}_2 + \text{OH}^\bullet$  reaction within temperature range of 213 K - 320 K.

| Temp (K) | WM                     | WD                     |
|----------|------------------------|------------------------|
| 213      | $6.89 \times 10^{-33}$ | $5.47 \times 10^{-31}$ |
| 216      | $6.10 \times 10^{-33}$ | $4.10 \times 10^{-31}$ |
| 219      | $5.44 \times 10^{-33}$ | $3.10 \times 10^{-31}$ |
| 224      | $4.52 \times 10^{-33}$ | $1.98 \times 10^{-31}$ |
| 235      | $3.11 \times 10^{-33}$ | $7.94 \times 10^{-32}$ |
| 250      | $2.00 \times 10^{-33}$ | $2.63 \times 10^{-32}$ |
| 259      | $1.59 \times 10^{-33}$ | $1.45 \times 10^{-32}$ |
| 280      | $9.98 \times 10^{-34}$ | $4.27 \times 10^{-33}$ |
| 290      | $8.25 \times 10^{-34}$ | $2.56 \times 10^{-33}$ |
| 298      | $7.19 \times 10^{-34}$ | $1.75 \times 10^{-33}$ |
| 300      | $6.95 \times 10^{-34}$ | $1.59 \times 10^{-33}$ |
| 310      | $5.95 \times 10^{-34}$ | $1.03 \times 10^{-33}$ |
| 320      | $5.17 \times 10^{-34}$ | $6.82 \times 10^{-34}$ |

Table S14: Values of rate constants  $k_{HL}^{TST}$  in  $s^{-1}$ , transmission coefficient ( $\Gamma_{LL}$ ), and ZCT and SCT tunneling correction for water monomer catalyzed  $\text{HOCl} + \text{Cl} \rightarrow \text{HCl} + \text{ClO}$  reaction.

| Temp (K) | $k_{HL}^{TST}$     | $\Gamma_{LL}$ | $\kappa_{LL}^{ZCT}$ | $\kappa_{LL}^{SCT}$ |
|----------|--------------------|---------------|---------------------|---------------------|
| 213      | $7.71 \times 10^3$ | 0.89          | 5.07                | $1.78 \times 10^1$  |
| 216      | $9.84 \times 10^3$ | 0.89          | 4.78                | $1.57 \times 10^1$  |
| 219      | $1.25 \times 10^4$ | 0.89          | 4.51                | $1.40 \times 10^1$  |
| 224      | $1.83 \times 10^4$ | 0.89          | 4.14                | $1.17 \times 10^1$  |
| 235      | $3.98 \times 10^4$ | 0.89          | 3.51                | 8.41                |
| 250      | $1.03 \times 10^5$ | 0.90          | 2.93                | 5.95                |
| 259      | $1.71 \times 10^5$ | 0.90          | 2.68                | 5.05                |
| 280      | $4.96 \times 10^5$ | 0.90          | 2.27                | 3.74                |
| 290      | $7.76 \times 10^5$ | 0.90          | 2.13                | 3.34                |
| 298      | $1.09 \times 10^6$ | 0.90          | 2.04                | 3.09                |
| 300      | $1.18 \times 10^6$ | 0.90          | 2.02                | 3.03                |
| 310      | $1.74 \times 10^6$ | 0.90          | 1.92                | 2.79                |
| 320      | $2.50 \times 10^6$ | 0.91          | 1.83                | 2.59                |
| 320      | $3.20 \times 10^6$ | 1.15          | 1.04                | 1.21                |

Table S15: Values of rate constants  $k_{HL}^{TST}$  in  $s^{-1}$ , transmission coefficient ( $\Gamma_{LL}$ ), and ZCT and SCT tunneling correction for water dimer catalyzed  $HOCl + Cl \rightarrow HCl + ClO$  reaction.

| Temp (K) | $k_{HL}^{TST}$     | $\Gamma_{LL}$ | $\kappa_{LL}^{ZCT}$ | $\kappa_{LL}^{SCT}$ |
|----------|--------------------|---------------|---------------------|---------------------|
| 213      | 3.51               | 0.90          | 1.25                | 1.39                |
| 216      | 4.98               | 0.90          | 1.24                | 1.38                |
| 219      | 6.99               | 0.90          | 1.24                | 1.37                |
| 224      | $1.21 \times 10^1$ | 0.90          | 1.23                | 1.35                |
| 235      | $3.69 \times 10^1$ | 0.91          | 1.20                | 1.32                |
| 250      | $1.44 \times 10^2$ | 0.91          | 1.18                | 1.28                |
| 259      | $3.00 \times 10^2$ | 0.91          | 1.17                | 1.26                |
| 280      | $1.38 \times 10^3$ | 0.91          | 1.14                | 1.22                |
| 290      | $2.64 \times 10^3$ | 0.91          | 1.13                | 1.20                |
| 298      | $4.29 \times 10^3$ | 0.91          | 1.12                | 1.19                |
| 300      | $4.82 \times 10^3$ | 0.92          | 1.12                | 1.19                |
| 310      | $8.45 \times 10^3$ | 0.92          | 1.11                | 1.17                |
| 320      | $1.43 \times 10^4$ | 0.92          | 1.11                | 1.16                |
| 320      | $3.20 \times 10^4$ | 1.15          | 1.04                | 1.21                |

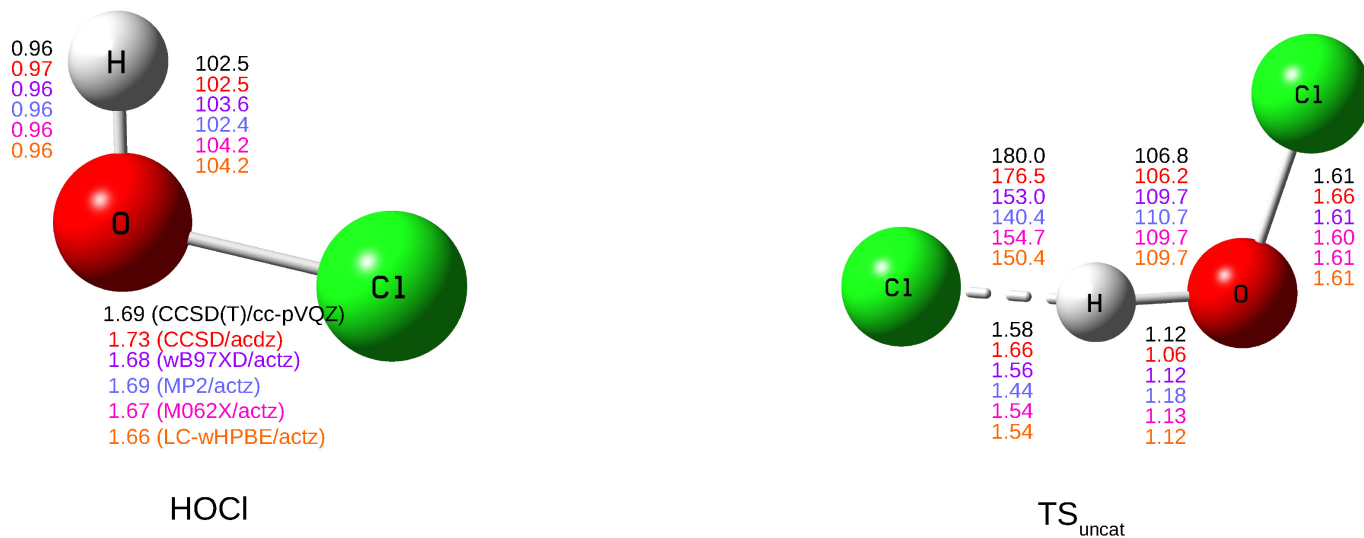

Figure S1: Comparison of geometrical parameters obtained at CCSD/aug-cc-pVDZ level of theory with others level of theory. All bond length are given in Å.



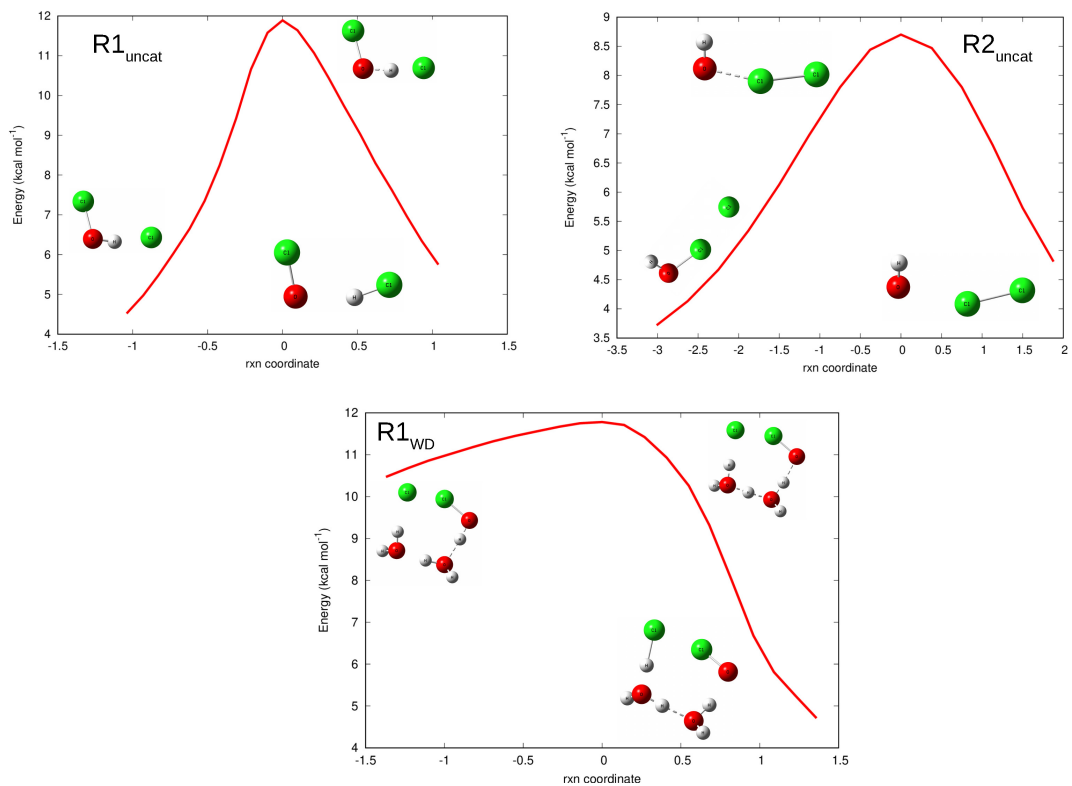

Figure S2: IRC calculation for HOCl + Cl reaction at M062X/aug-cc-pVTZ level of theory.

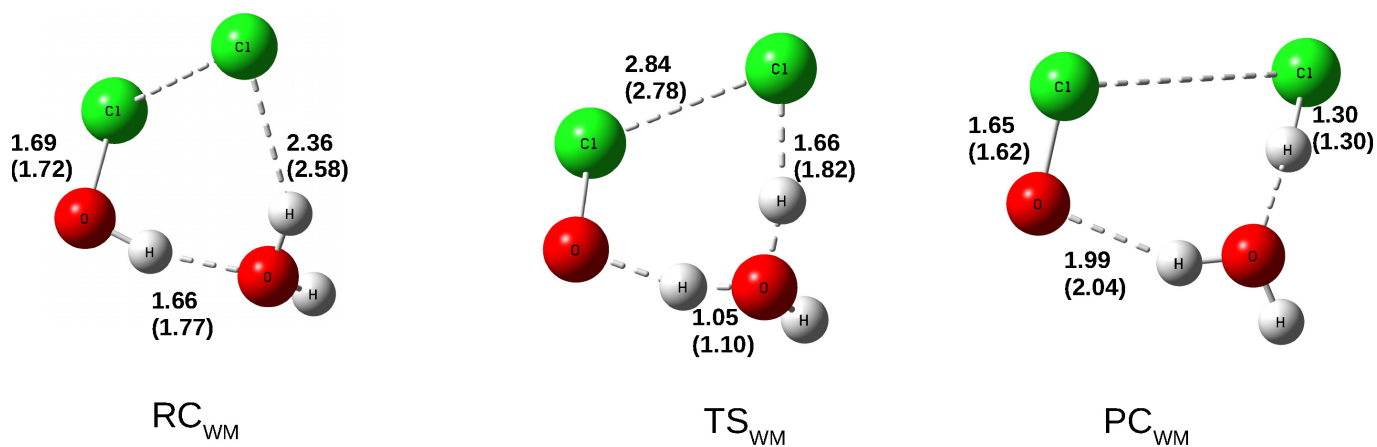

Figure S3: Comparison of geometrical parameters obtained at MO6-2X/aug-cc-pVTZ level of theory with CCSD/aug-cc-pVDZ level of theory ( in parenthesis) for water catalyzed  $\text{HOCl} + \text{HCl} \rightarrow \text{HCl} + \text{ClO}$  reaction. All bond length are given in Å.

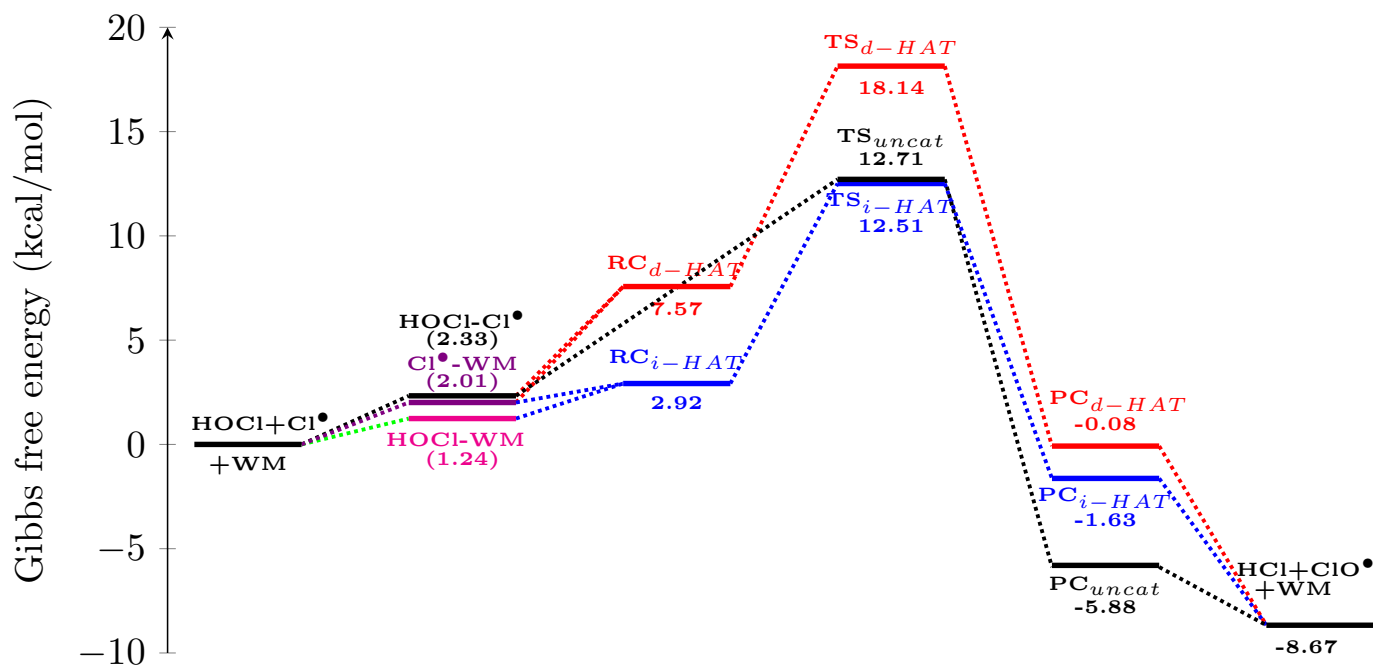

Figure S4: Gibbs free energy profile for H<sub>2</sub>O catalyzed HOCl + Cl<sup>•</sup> → HCl + ClO<sup>•</sup> reaction, calculated at CCSD(T)/CBS//M06-2X/aug-cc-pVTZ level of theory.

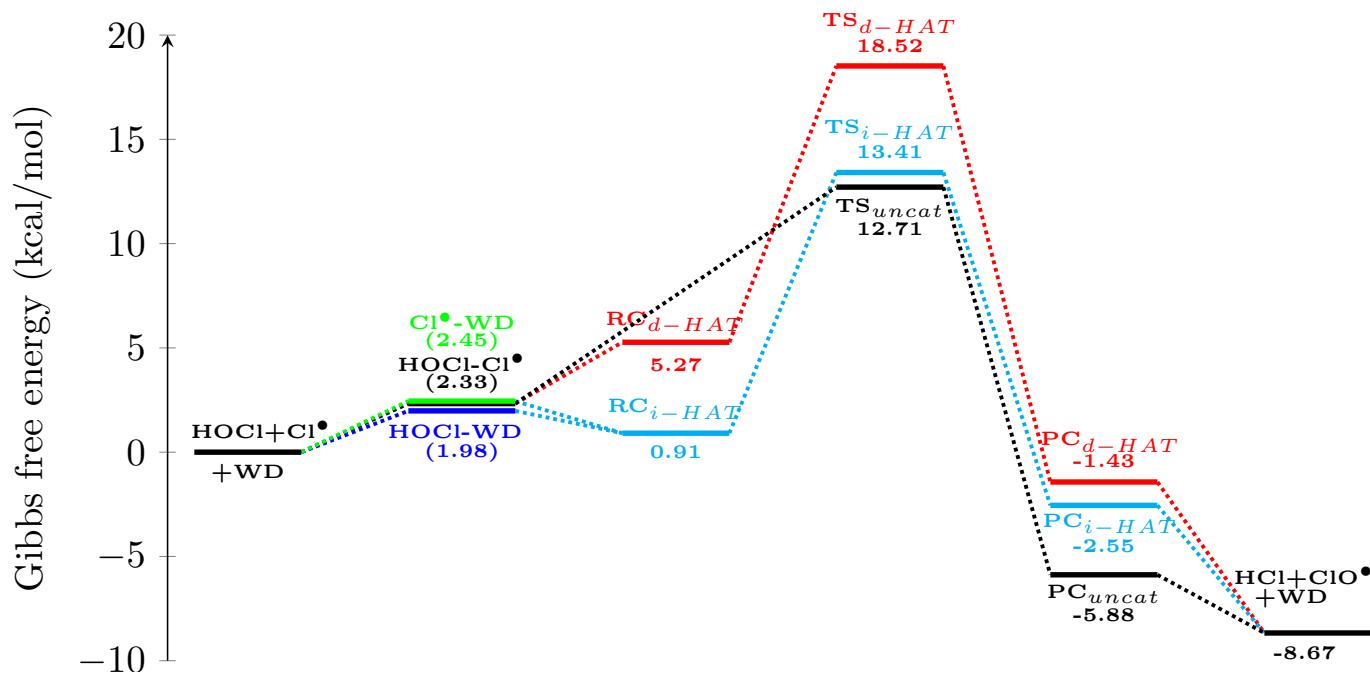

Figure S5: Gibbs free energy profile for  $(\text{H}_2\text{O})_2$  catalyzed  $\text{HOCl} + \text{Cl}^\bullet \rightarrow \text{HCl} + \text{ClO}^\bullet$  reaction, calculated at CCSD(T)/CBS//M06-2X/aug-cc-pVTZ level of theory.
